# Supplementary material for: Is there a hybridization barrier between Gentiana lutea color morphs?
Source: PeerJ. 2015 Oct 27;3:e1308. doi: 10.7717/peerj.1308 (PMC4627910; doi:10.7717/peerj.1308)
Supplement: Dataset S1 [file peerj-03-1308-s001.xlsx]

## Sheet: Seed number and weight
Plant	Treatment: L = Sa; R= Fa; N = C; A = Fxw; V = Fxa.	Aborts number	Seeds number	Seed weight (mg)	Flower color
1	A	14	154	8.8	Orange
1	L	133	0		Orange
1	N	14	146	6.6	Orange
1	R	107	0		Orange
1	V	10	101	7.8	Orange
2	A	2	118	4.4	Orange
2	L	97	6	1.3	Orange
2	N	16	90	3.8	Orange
2	R	38	3	0.9	Orange
2	V	16	98	7.8	Orange
3	A	11	105	11.5	Orange
3	L	73	0		Orange
3	N	10	101	10.2	Orange
3	R	88	10	9	Orange
3	V	28	80	9.3	Orange
4	A	5	79	15.3	Orange
4	L	94	9	11.8	Orange
4	N	11	64	13.4	Orange
4	R	29	53	14.2	Orange
4	V	5	69	14.8	Orange
5	A	38	89	9.3	Orange
5	L	130	3	4.8	Orange
5	N	37	73	15	Orange
5	R	135	0		Orange
5	V	54	84	15.9	Orange
8	A	63	88	12.4	Orange
8	L	113	6	3.8	Orange
8	N	8	53	3.8	Orange
8	R	83	33	8.8	Orange
8	V	12	152	11.4	Orange
10	A	29	82	14.1	Orange
10	L	54	7	3.9	Orange
10	N	15	92	13.7	Orange
10	R	65	0		Orange
10	V	16	78	12.6	Orange
11	A	34	92	15.1	Orange
11	L	113	16	22.1	Orange
11	N	10	98	7.5	Orange
11	R	126	0		Orange
11	V	3	116	16.4	Orange
12	A	10	78	16.6	Orange
12	L	77	3	2.7	Orange
12	N	5	90	14.9	Orange
12	R	46	0		Orange
12	V	14	78	16.7	Orange
13	A	10	119	13.8	Orange
13	L	148	4	3.6	Orange
13	N	25	140	13.4	Orange
13	R	162	4	4.8	Orange
13	V	14	148	15.3	Orange
14	A	66	103	11.5	Orange
14	L	166	0		Orange
14	N	82	105	12.7	Orange
14	R	185	0		Orange
14	V	68	92	9.4	Orange
17	A	34	131	4.4	Orange
17	L	138	0		Orange
17	N	7	134	3.3	Orange
17	R	144	0		Orange
17	V	26	96	3.5	Orange
18	A	16	57	16.5	Orange
18	L	89	3	3.4	Orange
18	N	8	6	2.3	Orange
18	R	80	16	22.1	Orange
18	V	22	82	17.4	Orange
19	A	62	71	7.4	Orange
19	L	128	7	5.3	Orange
19	N	30	90	6.3	Orange
19	R	132	2	2.3	Orange
19	V	82	62	7.3	Orange
20	A	9	105	8.6	Orange
20	L	103	13	16.6	Orange
20	N	53	62	10.6	Orange
20	R	101	1		Orange
20	V	10	98	12.7	Orange
22	A	10	121	10.9	Orange
22	L	113	0		Orange
22	N	8	127	9.7	Orange
22	R	102	3	1.2	Orange
22	V	7	113	7.1	Orange
24	A	12	94	13.3	Orange
24	L	96	2	2.8	Orange
24	N	7	72	14.4	Orange
24	R	69	5	8.6	Orange
24	V	13	76	15.1	Orange
25	A	4	124	12.9	Orange
25	L	111	6	6.2	Orange
25	N	12	89	13.5	Orange
25	R	106	2	1.7	Orange
25	V	5	140	11.9	Orange
33	A	12	86	12.6	Yellow
33	L	93	35	14.4	Yellow
33	N	8	127	10.7	Yellow
33	R	118	12	16.6	Yellow
33	V	20	97	12.4	Yellow
43	A	12	143	10.5	Yellow
43	L	171	0		Yellow
43	N	11	54	8.8	Yellow
43	R	134	2	1.2	Yellow
43	V	14	171	11.8	Yellow
48	A	13	56	8.9	Yellow
48	L	56	49	9.3	Yellow
48	N	15	41	5.7	Yellow
48	R	129	0		Yellow
48	V	26	92	13.1	Yellow
49	A	17	123	9.8	Yellow
49	L	93	0		Yellow
49	N	71	0		Yellow
49	R	113	0		Yellow
49	V	35	100	5.2	Yellow
51	A	9	96	13.1	Yellow
51	L	63	4	4.2	Yellow
51	N	44	57	11.2	Yellow
51	R	63	8	6.9	Yellow
51	V	26	96	14.2	Yellow
52	A	12	70	10	Yellow
52	L	52	4	2.2	Yellow
52	N	8	72	6.3	Yellow
52	R	59	17	9	Yellow
52	V	8	73	7.6	Yellow
53	A	7	89	12.6	Yellow
53	L	74	0		Yellow
53	N	6	84	7.8	Yellow
53	R	71	3		Yellow
53	V	12	82	9.5	Yellow
54	A	6	81	15	Yellow
54	L	66	0		Yellow
54	N	27	27	14.7	Yellow
54	R	86	1		Yellow
54	V	23	63	14.1	Yellow

## Sheet: Viable and germinated seeds
Treatment	Nºplate	Germinated seeds	Fungal Infection	Viables seeds
A	1	0	2	28
A	2	4	10	21
A	3	5	3	26
A	4	3	39	3
A	5	4	1	15
A	6	6	8	13
A	7	5	9	10
A	8	2	2	26
A	9	7	19	4
A	10	7	33	1
N	1	1	47	0
N	2	0	5	12
N	3	0	0	16
N	4	1	0	19
N	5	1	0	11
N	6	0	1	18
N	7	1	0	13
N	8	3	7	16
N	9	1	0	18
N	10	3	3	9
V	1	4	1	22
V	2	7	17	5
V	3	7	10	12
V	4	2	42	4
V	5	5	39	2
V	6	6	19	13
V	7	2	33	5
V	8	2	46	1
V	9	1	7	12
V	10	1	45	3
RL	1	0	2	13
RL	2	0	0	14
RL	3	0	24	2
RL	4	0	21	4
RL	5	0	25	2
RL	6	0	2	15
RL	7	0	0	2
RL	8	0	29	1
RL	9	0	18	4
RL	10	1	1	3

## Sheet: Seed viability and germinabilit
Tratamento	Treatment	nº plate	nº seed	Germinated	Viables
LR	Sa+Fa	1	1	0	1
LR	Sa+Fa	1	2	0	1
LR	Sa+Fa	1	3	0	1
LR	Sa+Fa	1	4	0	1
LR	Sa+Fa	1	5	0	1
LR	Sa+Fa	1	6	0	1
LR	Sa+Fa	1	7	0	1
LR	Sa+Fa	1	8	0	1
LR	Sa+Fa	1	9	0	1
LR	Sa+Fa	1	10	0	1
LR	Sa+Fa	1	11	0	1
LR	Sa+Fa	1	12	0	1
LR	Sa+Fa	1	13	0	1
LR	Sa+Fa	1	14	0	0
LR	Sa+Fa	1	15	0	0
LR	Sa+Fa	1	16	0	0
LR	Sa+Fa	1	17	0	0
LR	Sa+Fa	1	18	0	0
LR	Sa+Fa	1	19	0	0
LR	Sa+Fa	1	20	0	0
LR	Sa+Fa	1	21	0	0
LR	Sa+Fa	1	22	0	0
LR	Sa+Fa	1	23	0	0
LR	Sa+Fa	1	24	0	0
LR	Sa+Fa	1	25	0	0
LR	Sa+Fa	1	26	0	0
LR	Sa+Fa	1	27	0	0
LR	Sa+Fa	1	28	0	0
LR	Sa+Fa	1	29	0	0
LR	Sa+Fa	1	30	0	0
LR	Sa+Fa	2	1	0	1
LR	Sa+Fa	2	2	0	1
LR	Sa+Fa	2	3	0	1
LR	Sa+Fa	2	4	0	1
LR	Sa+Fa	2	5	0	1
LR	Sa+Fa	2	6	0	1
LR	Sa+Fa	2	7	0	1
LR	Sa+Fa	2	8	0	1
LR	Sa+Fa	2	9	0	1
LR	Sa+Fa	2	10	0	1
LR	Sa+Fa	2	11	0	1
LR	Sa+Fa	2	12	0	1
LR	Sa+Fa	2	13	0	1
LR	Sa+Fa	2	14	0	1
LR	Sa+Fa	2	15	0	0
LR	Sa+Fa	2	16	0	0
LR	Sa+Fa	2	17	0	0
LR	Sa+Fa	2	18	0	0
LR	Sa+Fa	2	19	0	0
LR	Sa+Fa	2	20	0	0
LR	Sa+Fa	2	21	0	0
LR	Sa+Fa	2	22	0	0
LR	Sa+Fa	2	23	0	0
LR	Sa+Fa	2	24	0	0
LR	Sa+Fa	2	25	0	0
LR	Sa+Fa	2	26	0	0
LR	Sa+Fa	2	27	0	0
LR	Sa+Fa	2	28	0	0
LR	Sa+Fa	2	29	0	0
LR	Sa+Fa	2	30	0	0
LR	Sa+Fa	3	1	0	1
LR	Sa+Fa	3	2	0	1
LR	Sa+Fa	3	3	0	0
LR	Sa+Fa	3	4	0	0
LR	Sa+Fa	3	5	0	0
LR	Sa+Fa	3	6	0	0
LR	Sa+Fa	3	7	0	0
LR	Sa+Fa	3	8	0	0
LR	Sa+Fa	3	9	0	0
LR	Sa+Fa	3	10	0	0
LR	Sa+Fa	3	11	0	0
LR	Sa+Fa	3	12	0	0
LR	Sa+Fa	3	13	0	0
LR	Sa+Fa	3	14	0	0
LR	Sa+Fa	3	15	0	0
LR	Sa+Fa	3	16	0	0
LR	Sa+Fa	3	17	0	0
LR	Sa+Fa	3	18	0	0
LR	Sa+Fa	3	19	0	0
LR	Sa+Fa	3	20	0	0
LR	Sa+Fa	3	21	0	0
LR	Sa+Fa	3	22	0	0
LR	Sa+Fa	3	23	0	0
LR	Sa+Fa	3	24	0	0
LR	Sa+Fa	3	25	0	0
LR	Sa+Fa	3	26	0	0
LR	Sa+Fa	3	27	0	0
LR	Sa+Fa	3	28	0	0
LR	Sa+Fa	3	29	0	0
LR	Sa+Fa	3	30	0	0
LR	Sa+Fa	4	1	0	1
LR	Sa+Fa	4	2	0	1
LR	Sa+Fa	4	3	0	1
LR	Sa+Fa	4	4	0	1
LR	Sa+Fa	4	5	0	0
LR	Sa+Fa	4	6	0	0
LR	Sa+Fa	4	7	0	0
LR	Sa+Fa	4	8	0	0
LR	Sa+Fa	4	9	0	0
LR	Sa+Fa	4	10	0	0
LR	Sa+Fa	4	11	0	0
LR	Sa+Fa	4	12	0	0
LR	Sa+Fa	4	13	0	0
LR	Sa+Fa	4	14	0	0
LR	Sa+Fa	4	15	0	0
LR	Sa+Fa	4	16	0	0
LR	Sa+Fa	4	17	0	0
LR	Sa+Fa	4	18	0	0
LR	Sa+Fa	4	19	0	0
LR	Sa+Fa	4	20	0	0
LR	Sa+Fa	4	21	0	0
LR	Sa+Fa	4	22	0	0
LR	Sa+Fa	4	23	0	0
LR	Sa+Fa	4	24	0	0
LR	Sa+Fa	4	25	0	0
LR	Sa+Fa	4	26	0	0
LR	Sa+Fa	4	27	0	0
LR	Sa+Fa	4	28	0	0
LR	Sa+Fa	4	29	0	0
LR	Sa+Fa	4	30	0	0
LR	Sa+Fa	5	1	0	1
LR	Sa+Fa	5	2	0	1
LR	Sa+Fa	5	3	0	0
LR	Sa+Fa	5	4	0	0
LR	Sa+Fa	5	5	0	0
LR	Sa+Fa	5	6	0	0
LR	Sa+Fa	5	7	0	0
LR	Sa+Fa	5	8	0	0
LR	Sa+Fa	5	9	0	0
LR	Sa+Fa	5	10	0	0
LR	Sa+Fa	5	11	0	0
LR	Sa+Fa	5	12	0	0
LR	Sa+Fa	5	13	0	0
LR	Sa+Fa	5	14	0	0
LR	Sa+Fa	5	15	0	0
LR	Sa+Fa	5	16	0	0
LR	Sa+Fa	5	17	0	0
LR	Sa+Fa	5	18	0	0
LR	Sa+Fa	5	19	0	0
LR	Sa+Fa	5	20	0	0
LR	Sa+Fa	5	21	0	0
LR	Sa+Fa	5	22	0	0
LR	Sa+Fa	5	23	0	0
LR	Sa+Fa	5	24	0	0
LR	Sa+Fa	5	25	0	0
LR	Sa+Fa	5	26	0	0
LR	Sa+Fa	5	27	0	0
LR	Sa+Fa	5	28	0	0
LR	Sa+Fa	5	29	0	0
LR	Sa+Fa	5	30	0	0
LR	Sa+Fa	6	1	0	1
LR	Sa+Fa	6	2	0	1
LR	Sa+Fa	6	3	0	1
LR	Sa+Fa	6	4	0	1
LR	Sa+Fa	6	5	0	1
LR	Sa+Fa	6	6	0	1
LR	Sa+Fa	6	7	0	1
LR	Sa+Fa	6	8	0	1
LR	Sa+Fa	6	9	0	1
LR	Sa+Fa	6	10	0	1
LR	Sa+Fa	6	11	0	1
LR	Sa+Fa	6	12	0	1
LR	Sa+Fa	6	13	0	1
LR	Sa+Fa	6	14	0	1
LR	Sa+Fa	6	15	0	1
LR	Sa+Fa	6	16	0	0
LR	Sa+Fa	6	17	0	0
LR	Sa+Fa	6	18	0	0
LR	Sa+Fa	6	19	0	0
LR	Sa+Fa	6	20	0	0
LR	Sa+Fa	6	21	0	0
LR	Sa+Fa	6	22	0	0
LR	Sa+Fa	6	23	0	0
LR	Sa+Fa	6	24	0	0
LR	Sa+Fa	6	25	0	0
LR	Sa+Fa	6	26	0	0
LR	Sa+Fa	6	27	0	0
LR	Sa+Fa	6	28	0	0
LR	Sa+Fa	6	29	0	0
LR	Sa+Fa	6	30	0	0
LR	Sa+Fa	7	1	0	1
LR	Sa+Fa	7	2	0	1
LR	Sa+Fa	7	3	0	0
LR	Sa+Fa	7	4	0	0
LR	Sa+Fa	7	5	0	0
LR	Sa+Fa	7	6	0	0
LR	Sa+Fa	7	7	0	0
LR	Sa+Fa	7	8	0	0
LR	Sa+Fa	7	9	0	0
LR	Sa+Fa	7	10	0	0
LR	Sa+Fa	7	11	0	0
LR	Sa+Fa	7	12	0	0
LR	Sa+Fa	7	13	0	0
LR	Sa+Fa	7	14	0	0
LR	Sa+Fa	7	15	0	0
LR	Sa+Fa	7	16	0	0
LR	Sa+Fa	7	17	0	0
LR	Sa+Fa	7	18	0	0
LR	Sa+Fa	7	19	0	0
LR	Sa+Fa	7	20	0	0
LR	Sa+Fa	7	21	0	0
LR	Sa+Fa	7	22	0	0
LR	Sa+Fa	7	23	0	0
LR	Sa+Fa	7	24	0	0
LR	Sa+Fa	7	25	0	0
LR	Sa+Fa	7	26	0	0
LR	Sa+Fa	7	27	0	0
LR	Sa+Fa	7	28	0	0
LR	Sa+Fa	7	29	0	0
LR	Sa+Fa	7	30	0	0
LR	Sa+Fa	8	1	0	1
LR	Sa+Fa	8	2	0	0
LR	Sa+Fa	8	3	0	0
LR	Sa+Fa	8	4	0	0
LR	Sa+Fa	8	5	0	0
LR	Sa+Fa	8	6	0	0
LR	Sa+Fa	8	7	0	0
LR	Sa+Fa	8	8	0	0
LR	Sa+Fa	8	9	0	0
LR	Sa+Fa	8	10	0	0
LR	Sa+Fa	8	11	0	0
LR	Sa+Fa	8	12	0	0
LR	Sa+Fa	8	13	0	0
LR	Sa+Fa	8	14	0	0
LR	Sa+Fa	8	15	0	0
LR	Sa+Fa	8	16	0	0
LR	Sa+Fa	8	17	0	0
LR	Sa+Fa	8	18	0	0
LR	Sa+Fa	8	19	0	0
LR	Sa+Fa	8	20	0	0
LR	Sa+Fa	8	21	0	0
LR	Sa+Fa	8	22	0	0
LR	Sa+Fa	8	23	0	0
LR	Sa+Fa	8	24	0	0
LR	Sa+Fa	8	25	0	0
LR	Sa+Fa	8	26	0	0
LR	Sa+Fa	8	27	0	0
LR	Sa+Fa	8	28	0	0
LR	Sa+Fa	8	29	0	0
LR	Sa+Fa	8	30	0	0
LR	Sa+Fa	9	1	0	1
LR	Sa+Fa	9	2	0	1
LR	Sa+Fa	9	3	0	1
LR	Sa+Fa	9	4	0	1
LR	Sa+Fa	9	5	0	0
LR	Sa+Fa	9	6	0	0
LR	Sa+Fa	9	7	0	0
LR	Sa+Fa	9	8	0	0
LR	Sa+Fa	9	9	0	0
LR	Sa+Fa	9	10	0	0
LR	Sa+Fa	9	11	0	0
LR	Sa+Fa	9	12	0	0
LR	Sa+Fa	9	13	0	0
LR	Sa+Fa	9	14	0	0
LR	Sa+Fa	9	15	0	0
LR	Sa+Fa	9	16	0	0
LR	Sa+Fa	9	17	0	0
LR	Sa+Fa	9	18	0	0
LR	Sa+Fa	9	19	0	0
LR	Sa+Fa	9	20	0	0
LR	Sa+Fa	9	21	0	0
LR	Sa+Fa	9	22	0	0
LR	Sa+Fa	9	23	0	0
LR	Sa+Fa	9	24	0	0
LR	Sa+Fa	9	25	0	0
LR	Sa+Fa	9	26	0	0
LR	Sa+Fa	9	27	0	0
LR	Sa+Fa	9	28	0	0
LR	Sa+Fa	9	29	0	0
LR	Sa+Fa	9	30	0	0
LR	Sa+Fa	10	1	1	1
LR	Sa+Fa	10	2	0	1
LR	Sa+Fa	10	3	0	1
LR	Sa+Fa	10	4	0	0
LR	Sa+Fa	10	5	0	0
LR	Sa+Fa	10	6	0	0
LR	Sa+Fa	10	7	0	0
LR	Sa+Fa	10	8	0	0
LR	Sa+Fa	10	9	0	0
LR	Sa+Fa	10	10	0	0
LR	Sa+Fa	10	11	0	0
LR	Sa+Fa	10	12	0	0
LR	Sa+Fa	10	13	0	0
LR	Sa+Fa	10	14	0	0
LR	Sa+Fa	10	15	0	0
LR	Sa+Fa	10	16	0	0
LR	Sa+Fa	10	17	0	0
LR	Sa+Fa	10	18	0	0
LR	Sa+Fa	10	19	0	0
LR	Sa+Fa	10	20	0	0
LR	Sa+Fa	10	21	0	0
LR	Sa+Fa	10	22	0	0
LR	Sa+Fa	10	23	0	0
LR	Sa+Fa	10	24	0	0
LR	Sa+Fa	10	25	0	0
LR	Sa+Fa	10	26	0	0
LR	Sa+Fa	10	27	0	0
LR	Sa+Fa	10	28	0	0
LR	Sa+Fa	10	29	0	0
LR	Sa+Fa	10	30	0	0
N	C	1	1	1	0
N	C	1	2	0	0
N	C	1	3	0	0
N	C	1	4	0	0
N	C	1	5	0	0
N	C	1	6	0	0
N	C	1	7	0	0
N	C	1	8	0	0
N	C	1	9	0	0
N	C	1	10	0	0
N	C	1	11	0	0
N	C	1	12	0	0
N	C	1	13	0	0
N	C	1	14	0	0
N	C	1	15	0	0
N	C	1	16	0	0
N	C	1	17	0	0
N	C	1	18	0	0
N	C	1	19	0	0
N	C	1	20	0	0
N	C	1	21	0	0
N	C	1	22	0	0
N	C	1	23	0	0
N	C	1	24	0	0
N	C	1	25	0	0
N	C	1	26	0	0
N	C	1	27	0	0
N	C	1	28	0	0
N	C	1	29	0	0
N	C	1	30	0	0
N	C	1	31	0	0
N	C	1	32	0	0
N	C	1	33	0	0
N	C	1	34	0	0
N	C	1	35	0	0
N	C	1	36	0	0
N	C	1	37	0	0
N	C	1	38	0	0
N	C	1	39	0	0
N	C	1	40	0	0
N	C	1	41	0	0
N	C	1	42	0	0
N	C	1	43	0	0
N	C	1	44	0	0
N	C	1	45	0	0
N	C	1	46	0	0
N	C	1	47	0	0
N	C	1	48	0	0
N	C	1	49	0	0
N	C	1	50	0	0
N	C	2	1	0	1
N	C	2	2	0	1
N	C	2	3	0	1
N	C	2	4	0	1
N	C	2	5	0	1
N	C	2	6	0	1
N	C	2	7	0	1
N	C	2	8	0	1
N	C	2	9	0	1
N	C	2	10	0	1
N	C	2	11	0	1
N	C	2	12	0	1
N	C	2	13	0	0
N	C	2	14	0	0
N	C	2	15	0	0
N	C	2	16	0	0
N	C	2	17	0	0
N	C	2	18	0	0
N	C	2	19	0	0
N	C	2	20	0	0
N	C	2	21	0	0
N	C	2	22	0	0
N	C	2	23	0	0
N	C	2	24	0	0
N	C	2	25	0	0
N	C	2	26	0	0
N	C	2	27	0	0
N	C	2	28	0	0
N	C	2	29	0	0
N	C	2	30	0	0
N	C	2	31	0	0
N	C	2	32	0	0
N	C	2	33	0	0
N	C	2	34	0	0
N	C	2	35	0	0
N	C	2	36	0	0
N	C	2	37	0	0
N	C	2	38	0	0
N	C	2	39	0	0
N	C	2	40	0	0
N	C	2	41	0	0
N	C	2	42	0	0
N	C	2	43	0	0
N	C	2	44	0	0
N	C	2	45	0	0
N	C	2	46	0	0
N	C	2	47	0	0
N	C	2	48	0	0
N	C	2	49	0	0
N	C	2	50	0	0
N	C	3	1	0	1
N	C	3	2	0	1
N	C	3	3	0	1
N	C	3	4	0	1
N	C	3	5	0	1
N	C	3	6	0	1
N	C	3	7	0	1
N	C	3	8	0	1
N	C	3	9	0	1
N	C	3	10	0	1
N	C	3	11	0	1
N	C	3	12	0	1
N	C	3	13	0	1
N	C	3	14	0	1
N	C	3	15	0	1
N	C	3	16	0	1
N	C	3	17	0	0
N	C	3	18	0	0
N	C	3	19	0	0
N	C	3	20	0	0
N	C	3	21	0	0
N	C	3	22	0	0
N	C	3	23	0	0
N	C	3	24	0	0
N	C	3	25	0	0
N	C	3	26	0	0
N	C	3	27	0	0
N	C	3	28	0	0
N	C	3	29	0	0
N	C	3	30	0	0
N	C	3	31	0	0
N	C	3	32	0	0
N	C	3	33	0	0
N	C	3	34	0	0
N	C	3	35	0	0
N	C	3	36	0	0
N	C	3	37	0	0
N	C	3	38	0	0
N	C	3	39	0	0
N	C	3	40	0	0
N	C	3	41	0	0
N	C	3	42	0	0
N	C	3	43	0	0
N	C	3	44	0	0
N	C	3	45	0	0
N	C	3	46	0	0
N	C	3	47	0	0
N	C	3	48	0	0
N	C	3	49	0	0
N	C	3	50	0	0
N	C	4	1	1	1
N	C	4	2	0	1
N	C	4	3	0	1
N	C	4	4	0	1
N	C	4	5	0	1
N	C	4	6	0	1
N	C	4	7	0	1
N	C	4	8	0	1
N	C	4	9	0	1
N	C	4	10	0	1
N	C	4	11	0	1
N	C	4	12	0	1
N	C	4	13	0	1
N	C	4	14	0	1
N	C	4	15	0	1
N	C	4	16	0	1
N	C	4	17	0	1
N	C	4	18	0	1
N	C	4	19	0	1
N	C	4	20	0	0
N	C	4	21	0	0
N	C	4	22	0	0
N	C	4	23	0	0
N	C	4	24	0	0
N	C	4	25	0	0
N	C	4	26	0	0
N	C	4	27	0	0
N	C	4	28	0	0
N	C	4	29	0	0
N	C	4	30	0	0
N	C	4	31	0	0
N	C	4	32	0	0
N	C	4	33	0	0
N	C	4	34	0	0
N	C	4	35	0	0
N	C	4	36	0	0
N	C	4	37	0	0
N	C	4	38	0	0
N	C	4	39	0	0
N	C	4	40	0	0
N	C	4	41	0	0
N	C	4	42	0	0
N	C	4	43	0	0
N	C	4	44	0	0
N	C	4	45	0	0
N	C	4	46	0	0
N	C	4	47	0	0
N	C	4	48	0	0
N	C	4	49	0	0
N	C	4	50	0	0
N	C	5	1	1	1
N	C	5	2	0	1
N	C	5	3	0	1
N	C	5	4	0	1
N	C	5	5	0	1
N	C	5	6	0	1
N	C	5	7	0	1
N	C	5	8	0	1
N	C	5	9	0	1
N	C	5	10	0	1
N	C	5	11	0	1
N	C	5	12	0	0
N	C	5	13	0	0
N	C	5	14	0	0
N	C	5	15	0	0
N	C	5	16	0	0
N	C	5	17	0	0
N	C	5	18	0	0
N	C	5	19	0	0
N	C	5	20	0	0
N	C	5	21	0	0
N	C	5	22	0	0
N	C	5	23	0	0
N	C	5	24	0	0
N	C	5	25	0	0
N	C	5	26	0	0
N	C	5	27	0	0
N	C	5	28	0	0
N	C	5	29	0	0
N	C	5	30	0	0
N	C	5	31	0	0
N	C	5	32	0	0
N	C	5	33	0	0
N	C	5	34	0	0
N	C	5	35	0	0
N	C	5	36	0	0
N	C	5	37	0	0
N	C	5	38	0	0
N	C	5	39	0	0
N	C	5	40	0	0
N	C	5	41	0	0
N	C	5	42	0	0
N	C	5	43	0	0
N	C	5	44	0	0
N	C	5	45	0	0
N	C	5	46	0	0
N	C	5	47	0	0
N	C	5	48	0	0
N	C	5	49	0	0
N	C	5	50	0	0
N	C	6	1	0	1
N	C	6	2	0	1
N	C	6	3	0	1
N	C	6	4	0	1
N	C	6	5	0	1
N	C	6	6	0	1
N	C	6	7	0	1
N	C	6	8	0	1
N	C	6	9	0	1
N	C	6	10	0	1
N	C	6	11	0	1
N	C	6	12	0	1
N	C	6	13	0	1
N	C	6	14	0	1
N	C	6	15	0	1
N	C	6	16	0	1
N	C	6	17	0	1
N	C	6	18	0	1
N	C	6	19	0	0
N	C	6	20	0	0
N	C	6	21	0	0
N	C	6	22	0	0
N	C	6	23	0	0
N	C	6	24	0	0
N	C	6	25	0	0
N	C	6	26	0	0
N	C	6	27	0	0
N	C	6	28	0	0
N	C	6	29	0	0
N	C	6	30	0	0
N	C	6	31	0	0
N	C	6	32	0	0
N	C	6	33	0	0
N	C	6	34	0	0
N	C	6	35	0	0
N	C	6	36	0	0
N	C	6	37	0	0
N	C	6	38	0	0
N	C	6	39	0	0
N	C	6	40	0	0
N	C	6	41	0	0
N	C	6	42	0	0
N	C	6	43	0	0
N	C	6	44	0	0
N	C	6	45	0	0
N	C	6	46	0	0
N	C	6	47	0	0
N	C	6	48	0	0
N	C	6	49	0	0
N	C	6	50	0	0
N	C	7	1	1	1
N	C	7	2	0	1
N	C	7	3	0	1
N	C	7	4	0	1
N	C	7	5	0	1
N	C	7	6	0	1
N	C	7	7	0	1
N	C	7	8	0	1
N	C	7	9	0	1
N	C	7	10	0	1
N	C	7	11	0	1
N	C	7	12	0	1
N	C	7	13	0	1
N	C	7	14	0	0
N	C	7	15	0	0
N	C	7	16	0	0
N	C	7	17	0	0
N	C	7	18	0	0
N	C	7	19	0	0
N	C	7	20	0	0
N	C	7	21	0	0
N	C	7	22	0	0
N	C	7	23	0	0
N	C	7	24	0	0
N	C	7	25	0	0
N	C	7	26	0	0
N	C	7	27	0	0
N	C	7	28	0	0
N	C	7	29	0	0
N	C	7	30	0	0
N	C	7	31	0	0
N	C	7	32	0	0
N	C	7	33	0	0
N	C	7	34	0	0
N	C	7	35	0	0
N	C	7	36	0	0
N	C	7	37	0	0
N	C	7	38	0	0
N	C	7	39	0	0
N	C	7	40	0	0
N	C	7	41	0	0
N	C	7	42	0	0
N	C	7	43	0	0
N	C	7	44	0	0
N	C	7	45	0	0
N	C	7	46	0	0
N	C	7	47	0	0
N	C	7	48	0	0
N	C	7	49	0	0
N	C	7	50	0	0
N	C	8	1	1	1
N	C	8	2	1	1
N	C	8	3	1	1
N	C	8	4	0	1
N	C	8	5	0	1
N	C	8	6	0	1
N	C	8	7	0	1
N	C	8	8	0	1
N	C	8	9	0	1
N	C	8	10	0	1
N	C	8	11	0	1
N	C	8	12	0	1
N	C	8	13	0	1
N	C	8	14	0	1
N	C	8	15	0	1
N	C	8	16	0	1
N	C	8	17	0	0
N	C	8	18	0	0
N	C	8	19	0	0
N	C	8	20	0	0
N	C	8	21	0	0
N	C	8	22	0	0
N	C	8	23	0	0
N	C	8	24	0	0
N	C	8	25	0	0
N	C	8	26	0	0
N	C	8	27	0	0
N	C	8	28	0	0
N	C	8	29	0	0
N	C	8	30	0	0
N	C	8	31	0	0
N	C	8	32	0	0
N	C	8	33	0	0
N	C	8	34	0	0
N	C	8	35	0	0
N	C	8	36	0	0
N	C	8	37	0	0
N	C	8	38	0	0
N	C	8	39	0	0
N	C	8	40	0	0
N	C	8	41	0	0
N	C	8	42	0	0
N	C	8	43	0	0
N	C	8	44	0	0
N	C	8	45	0	0
N	C	8	46	0	0
N	C	8	47	0	0
N	C	8	48	0	0
N	C	8	49	0	0
N	C	8	50	0	0
N	C	9	1	1	1
N	C	9	2	0	1
N	C	9	3	0	1
N	C	9	4	0	1
N	C	9	5	0	1
N	C	9	6	0	1
N	C	9	7	0	1
N	C	9	8	0	1
N	C	9	9	0	1
N	C	9	10	0	1
N	C	9	11	0	1
N	C	9	12	0	1
N	C	9	13	0	1
N	C	9	14	0	1
N	C	9	15	0	1
N	C	9	16	0	1
N	C	9	17	0	1
N	C	9	18	0	1
N	C	9	19	0	0
N	C	9	20	0	0
N	C	9	21	0	0
N	C	9	22	0	0
N	C	9	23	0	0
N	C	9	24	0	0
N	C	9	25	0	0
N	C	9	26	0	0
N	C	9	27	0	0
N	C	9	28	0	0
N	C	9	29	0	0
N	C	9	30	0	0
N	C	9	31	0	0
N	C	9	32	0	0
N	C	9	33	0	0
N	C	9	34	0	0
N	C	9	35	0	0
N	C	9	36	0	0
N	C	9	37	0	0
N	C	9	38	0	0
N	C	9	39	0	0
N	C	9	40	0	0
N	C	9	41	0	0
N	C	9	42	0	0
N	C	9	43	0	0
N	C	9	44	0	0
N	C	9	45	0	0
N	C	9	46	0	0
N	C	9	47	0	0
N	C	9	48	0	0
N	C	9	49	0	0
N	C	9	50	0	0
N	C	10	1	1	1
N	C	10	2	1	1
N	C	10	3	1	1
N	C	10	4	0	1
N	C	10	5	0	1
N	C	10	6	0	1
N	C	10	7	0	1
N	C	10	8	0	1
N	C	10	9	0	1
N	C	10	10	0	0
N	C	10	11	0	0
N	C	10	12	0	0
N	C	10	13	0	0
N	C	10	14	0	0
N	C	10	15	0	0
N	C	10	16	0	0
N	C	10	17	0	0
N	C	10	18	0	0
N	C	10	19	0	0
N	C	10	20	0	0
N	C	10	21	0	0
N	C	10	22	0	0
N	C	10	23	0	0
N	C	10	24	0	0
N	C	10	25	0	0
N	C	10	26	0	0
N	C	10	27	0	0
N	C	10	28	0	0
N	C	10	29	0	0
N	C	10	30	0	0
N	C	10	31	0	0
N	C	10	32	0	0
N	C	10	33	0	0
N	C	10	34	0	0
N	C	10	35	0	0
N	C	10	36	0	0
N	C	10	37	0	0
N	C	10	38	0	0
N	C	10	39	0	0
N	C	10	40	0	0
N	C	10	41	0	0
N	C	10	42	0	0
N	C	10	43	0	0
N	C	10	44	0	0
N	C	10	45	0	0
N	C	10	46	0	0
N	C	10	47	0	0
N	C	10	48	0	0
N	C	10	49	0	0
N	C	10	50	0	0
A	Fxw	1	1	0	1
A	Fxw	1	2	0	1
A	Fxw	1	3	0	1
A	Fxw	1	4	0	1
A	Fxw	1	5	0	1
A	Fxw	1	6	0	1
A	Fxw	1	7	0	1
A	Fxw	1	8	0	1
A	Fxw	1	9	0	1
A	Fxw	1	10	0	1
A	Fxw	1	11	0	1
A	Fxw	1	12	0	1
A	Fxw	1	13	0	1
A	Fxw	1	14	0	1
A	Fxw	1	15	0	1
A	Fxw	1	16	0	1
A	Fxw	1	17	0	1
A	Fxw	1	18	0	1
A	Fxw	1	19	0	1
A	Fxw	1	20	0	1
A	Fxw	1	21	0	1
A	Fxw	1	22	0	1
A	Fxw	1	23	0	1
A	Fxw	1	24	0	1
A	Fxw	1	25	0	1
A	Fxw	1	26	0	1
A	Fxw	1	27	0	1
A	Fxw	1	28	0	1
A	Fxw	1	29	0	0
A	Fxw	1	30	0	0
A	Fxw	1	31	0	0
A	Fxw	1	32	0	0
A	Fxw	1	33	0	0
A	Fxw	1	34	0	0
A	Fxw	1	35	0	0
A	Fxw	1	36	0	0
A	Fxw	1	37	0	0
A	Fxw	1	38	0	0
A	Fxw	1	39	0	0
A	Fxw	1	40	0	0
A	Fxw	1	41	0	0
A	Fxw	1	42	0	0
A	Fxw	1	43	0	0
A	Fxw	1	44	0	0
A	Fxw	1	45	0	0
A	Fxw	1	46	0	0
A	Fxw	1	47	0	0
A	Fxw	1	48	0	0
A	Fxw	1	49	0	0
A	Fxw	1	50	0	0
A	Fxw	2	1	1	1
A	Fxw	2	2	1	1
A	Fxw	2	3	1	1
A	Fxw	2	4	1	1
A	Fxw	2	5	0	1
A	Fxw	2	6	0	1
A	Fxw	2	7	0	1
A	Fxw	2	8	0	1
A	Fxw	2	9	0	1
A	Fxw	2	10	0	1
A	Fxw	2	11	0	1
A	Fxw	2	12	0	1
A	Fxw	2	13	0	1
A	Fxw	2	14	0	1
A	Fxw	2	15	0	1
A	Fxw	2	16	0	1
A	Fxw	2	17	0	1
A	Fxw	2	18	0	1
A	Fxw	2	19	0	1
A	Fxw	2	20	0	1
A	Fxw	2	21	0	1
A	Fxw	2	22	0	0
A	Fxw	2	23	0	0
A	Fxw	2	24	0	0
A	Fxw	2	25	0	0
A	Fxw	2	26	0	0
A	Fxw	2	27	0	0
A	Fxw	2	28	0	0
A	Fxw	2	29	0	0
A	Fxw	2	30	0	0
A	Fxw	2	31	0	0
A	Fxw	2	32	0	0
A	Fxw	2	33	0	0
A	Fxw	2	34	0	0
A	Fxw	2	35	0	0
A	Fxw	2	36	0	0
A	Fxw	2	37	0	0
A	Fxw	2	38	0	0
A	Fxw	2	39	0	0
A	Fxw	2	40	0	0
A	Fxw	2	41	0	0
A	Fxw	2	42	0	0
A	Fxw	2	43	0	0
A	Fxw	2	44	0	0
A	Fxw	2	45	0	0
A	Fxw	2	46	0	0
A	Fxw	2	47	0	0
A	Fxw	2	48	0	0
A	Fxw	2	49	0	0
A	Fxw	2	50	0	0
A	Fxw	3	1	1	1
A	Fxw	3	2	1	1
A	Fxw	3	3	1	1
A	Fxw	3	4	1	1
A	Fxw	3	5	1	1
A	Fxw	3	6	0	1
A	Fxw	3	7	0	1
A	Fxw	3	8	0	1
A	Fxw	3	9	0	1
A	Fxw	3	10	0	1
A	Fxw	3	11	0	1
A	Fxw	3	12	0	1
A	Fxw	3	13	0	1
A	Fxw	3	14	0	1
A	Fxw	3	15	0	1
A	Fxw	3	16	0	1
A	Fxw	3	17	0	1
A	Fxw	3	18	0	1
A	Fxw	3	19	0	1
A	Fxw	3	20	0	1
A	Fxw	3	21	0	1
A	Fxw	3	22	0	1
A	Fxw	3	23	0	1
A	Fxw	3	24	0	1
A	Fxw	3	25	0	1
A	Fxw	3	26	0	1
A	Fxw	3	27	0	0
A	Fxw	3	28	0	0
A	Fxw	3	29	0	0
A	Fxw	3	30	0	0
A	Fxw	3	31	0	0
A	Fxw	3	32	0	0
A	Fxw	3	33	0	0
A	Fxw	3	34	0	0
A	Fxw	3	35	0	0
A	Fxw	3	36	0	0
A	Fxw	3	37	0	0
A	Fxw	3	38	0	0
A	Fxw	3	39	0	0
A	Fxw	3	40	0	0
A	Fxw	3	41	0	0
A	Fxw	3	42	0	0
A	Fxw	3	43	0	0
A	Fxw	3	44	0	0
A	Fxw	3	45	0	0
A	Fxw	3	46	0	0
A	Fxw	3	47	0	0
A	Fxw	3	48	0	0
A	Fxw	3	49	0	0
A	Fxw	3	50	0	0
A	Fxw	4	1	1	1
A	Fxw	4	2	1	1
A	Fxw	4	3	1	1
A	Fxw	4	4	0	0
A	Fxw	4	5	0	0
A	Fxw	4	6	0	0
A	Fxw	4	7	0	0
A	Fxw	4	8	0	0
A	Fxw	4	9	0	0
A	Fxw	4	10	0	0
A	Fxw	4	11	0	0
A	Fxw	4	12	0	0
A	Fxw	4	13	0	0
A	Fxw	4	14	0	0
A	Fxw	4	15	0	0
A	Fxw	4	16	0	0
A	Fxw	4	17	0	0
A	Fxw	4	18	0	0
A	Fxw	4	19	0	0
A	Fxw	4	20	0	0
A	Fxw	4	21	0	0
A	Fxw	4	22	0	0
A	Fxw	4	23	0	0
A	Fxw	4	24	0	0
A	Fxw	4	25	0	0
A	Fxw	4	26	0	0
A	Fxw	4	27	0	0
A	Fxw	4	28	0	0
A	Fxw	4	29	0	0
A	Fxw	4	30	0	0
A	Fxw	4	31	0	0
A	Fxw	4	32	0	0
A	Fxw	4	33	0	0
A	Fxw	4	34	0	0
A	Fxw	4	35	0	0
A	Fxw	4	36	0	0
A	Fxw	4	37	0	0
A	Fxw	4	38	0	0
A	Fxw	4	39	0	0
A	Fxw	4	40	0	0
A	Fxw	4	41	0	0
A	Fxw	4	42	0	0
A	Fxw	4	43	0	0
A	Fxw	4	44	0	0
A	Fxw	4	45	0	0
A	Fxw	4	46	0	0
A	Fxw	4	47	0	0
A	Fxw	4	48	0	0
A	Fxw	4	49	0	0
A	Fxw	4	50	0	0
A	Fxw	5	1	1	1
A	Fxw	5	2	1	1
A	Fxw	5	3	1	1
A	Fxw	5	4	1	1
A	Fxw	5	5	0	1
A	Fxw	5	6	0	1
A	Fxw	5	7	0	1
A	Fxw	5	8	0	1
A	Fxw	5	9	0	1
A	Fxw	5	10	0	1
A	Fxw	5	11	0	1
A	Fxw	5	12	0	1
A	Fxw	5	13	0	1
A	Fxw	5	14	0	1
A	Fxw	5	15	0	1
A	Fxw	5	16	0	0
A	Fxw	5	17	0	0
A	Fxw	5	18	0	0
A	Fxw	5	19	0	0
A	Fxw	5	20	0	0
A	Fxw	5	21	0	0
A	Fxw	5	22	0	0
A	Fxw	5	23	0	0
A	Fxw	5	24	0	0
A	Fxw	5	25	0	0
A	Fxw	5	26	0	0
A	Fxw	5	27	0	0
A	Fxw	5	28	0	0
A	Fxw	5	29	0	0
A	Fxw	5	30	0	0
A	Fxw	5	31	0	0
A	Fxw	5	32	0	0
A	Fxw	5	33	0	0
A	Fxw	5	34	0	0
A	Fxw	5	35	0	0
A	Fxw	5	36	0	0
A	Fxw	5	37	0	0
A	Fxw	5	38	0	0
A	Fxw	5	39	0	0
A	Fxw	5	40	0	0
A	Fxw	5	41	0	0
A	Fxw	5	42	0	0
A	Fxw	5	43	0	0
A	Fxw	5	44	0	0
A	Fxw	5	45	0	0
A	Fxw	5	46	0	0
A	Fxw	5	47	0	0
A	Fxw	5	48	0	0
A	Fxw	5	49	0	0
A	Fxw	5	50	0	0
A	Fxw	6	1	1	1
A	Fxw	6	2	1	1
A	Fxw	6	3	1	1
A	Fxw	6	4	1	1
A	Fxw	6	5	1	1
A	Fxw	6	6	1	1
A	Fxw	6	7	0	1
A	Fxw	6	8	0	1
A	Fxw	6	9	0	1
A	Fxw	6	10	0	1
A	Fxw	6	11	0	1
A	Fxw	6	12	0	1
A	Fxw	6	13	0	1
A	Fxw	6	14	0	0
A	Fxw	6	15	0	0
A	Fxw	6	16	0	0
A	Fxw	6	17	0	0
A	Fxw	6	18	0	0
A	Fxw	6	19	0	0
A	Fxw	6	20	0	0
A	Fxw	6	21	0	0
A	Fxw	6	22	0	0
A	Fxw	6	23	0	0
A	Fxw	6	24	0	0
A	Fxw	6	25	0	0
A	Fxw	6	26	0	0
A	Fxw	6	27	0	0
A	Fxw	6	28	0	0
A	Fxw	6	29	0	0
A	Fxw	6	30	0	0
A	Fxw	6	31	0	0
A	Fxw	6	32	0	0
A	Fxw	6	33	0	0
A	Fxw	6	34	0	0
A	Fxw	6	35	0	0
A	Fxw	6	36	0	0
A	Fxw	6	37	0	0
A	Fxw	6	38	0	0
A	Fxw	6	39	0	0
A	Fxw	6	40	0	0
A	Fxw	6	41	0	0
A	Fxw	6	42	0	0
A	Fxw	6	43	0	0
A	Fxw	6	44	0	0
A	Fxw	6	45	0	0
A	Fxw	6	46	0	0
A	Fxw	6	47	0	0
A	Fxw	6	48	0	0
A	Fxw	6	49	0	0
A	Fxw	6	50	0	0
A	Fxw	7	1	1	1
A	Fxw	7	2	1	1
A	Fxw	7	3	1	1
A	Fxw	7	4	1	1
A	Fxw	7	5	1	1
A	Fxw	7	6	0	1
A	Fxw	7	7	0	1
A	Fxw	7	8	0	1
A	Fxw	7	9	0	1
A	Fxw	7	10	0	1
A	Fxw	7	11	0	0
A	Fxw	7	12	0	0
A	Fxw	7	13	0	0
A	Fxw	7	14	0	0
A	Fxw	7	15	0	0
A	Fxw	7	16	0	0
A	Fxw	7	17	0	0
A	Fxw	7	18	0	0
A	Fxw	7	19	0	0
A	Fxw	7	20	0	0
A	Fxw	7	21	0	0
A	Fxw	7	22	0	0
A	Fxw	7	23	0	0
A	Fxw	7	24	0	0
A	Fxw	7	25	0	0
A	Fxw	7	26	0	0
A	Fxw	7	27	0	0
A	Fxw	7	28	0	0
A	Fxw	7	29	0	0
A	Fxw	7	30	0	0
A	Fxw	7	31	0	0
A	Fxw	7	32	0	0
A	Fxw	7	33	0	0
A	Fxw	7	34	0	0
A	Fxw	7	35	0	0
A	Fxw	7	36	0	0
A	Fxw	7	37	0	0
A	Fxw	7	38	0	0
A	Fxw	7	39	0	0
A	Fxw	7	40	0	0
A	Fxw	7	41	0	0
A	Fxw	7	42	0	0
A	Fxw	7	43	0	0
A	Fxw	7	44	0	0
A	Fxw	7	45	0	0
A	Fxw	7	46	0	0
A	Fxw	7	47	0	0
A	Fxw	7	48	0	0
A	Fxw	7	49	0	0
A	Fxw	7	50	0	0
A	Fxw	8	1	1	1
A	Fxw	8	2	1	1
A	Fxw	8	3	0	1
A	Fxw	8	4	0	1
A	Fxw	8	5	0	1
A	Fxw	8	6	0	1
A	Fxw	8	7	0	1
A	Fxw	8	8	0	1
A	Fxw	8	9	0	1
A	Fxw	8	10	0	1
A	Fxw	8	11	0	1
A	Fxw	8	12	0	1
A	Fxw	8	13	0	1
A	Fxw	8	14	0	1
A	Fxw	8	15	0	1
A	Fxw	8	16	0	1
A	Fxw	8	17	0	1
A	Fxw	8	18	0	1
A	Fxw	8	19	0	1
A	Fxw	8	20	0	1
A	Fxw	8	21	0	1
A	Fxw	8	22	0	1
A	Fxw	8	23	0	1
A	Fxw	8	24	0	1
A	Fxw	8	25	0	1
A	Fxw	8	26	0	1
A	Fxw	8	27	0	0
A	Fxw	8	28	0	0
A	Fxw	8	29	0	0
A	Fxw	8	30	0	0
A	Fxw	8	31	0	0
A	Fxw	8	32	0	0
A	Fxw	8	33	0	0
A	Fxw	8	34	0	0
A	Fxw	8	35	0	0
A	Fxw	8	36	0	0
A	Fxw	8	37	0	0
A	Fxw	8	38	0	0
A	Fxw	8	39	0	0
A	Fxw	8	40	0	0
A	Fxw	8	41	0	0
A	Fxw	8	42	0	0
A	Fxw	8	43	0	0
A	Fxw	8	44	0	0
A	Fxw	8	45	0	0
A	Fxw	8	46	0	0
A	Fxw	8	47	0	0
A	Fxw	8	48	0	0
A	Fxw	8	49	0	0
A	Fxw	8	50	0	0
A	Fxw	9	1	1	1
A	Fxw	9	2	1	1
A	Fxw	9	3	1	1
A	Fxw	9	4	1	1
A	Fxw	9	5	1	0
A	Fxw	9	6	1	0
A	Fxw	9	7	1	0
A	Fxw	9	8	0	0
A	Fxw	9	9	0	0
A	Fxw	9	10	0	0
A	Fxw	9	11	0	0
A	Fxw	9	12	0	0
A	Fxw	9	13	0	0
A	Fxw	9	14	0	0
A	Fxw	9	15	0	0
A	Fxw	9	16	0	0
A	Fxw	9	17	0	0
A	Fxw	9	18	0	0
A	Fxw	9	19	0	0
A	Fxw	9	20	0	0
A	Fxw	9	21	0	0
A	Fxw	9	22	0	0
A	Fxw	9	23	0	0
A	Fxw	9	24	0	0
A	Fxw	9	25	0	0
A	Fxw	9	26	0	0
A	Fxw	9	27	0	0
A	Fxw	9	28	0	0
A	Fxw	9	29	0	0
A	Fxw	9	30	0	0
A	Fxw	9	31	0	0
A	Fxw	9	32	0	0
A	Fxw	9	33	0	0
A	Fxw	9	34	0	0
A	Fxw	9	35	0	0
A	Fxw	9	36	0	0
A	Fxw	9	37	0	0
A	Fxw	9	38	0	0
A	Fxw	9	39	0	0
A	Fxw	9	40	0	0
A	Fxw	9	41	0	0
A	Fxw	9	42	0	0
A	Fxw	9	43	0	0
A	Fxw	9	44	0	0
A	Fxw	9	45	0	0
A	Fxw	9	46	0	0
A	Fxw	9	47	0	0
A	Fxw	9	48	0	0
A	Fxw	9	49	0	0
A	Fxw	9	50	0	0
A	Fxw	10	1	1	1
A	Fxw	10	2	1	0
A	Fxw	10	3	1	0
A	Fxw	10	4	1	0
A	Fxw	10	5	1	0
A	Fxw	10	6	1	0
A	Fxw	10	7	1	0
A	Fxw	10	8	0	0
A	Fxw	10	9	0	0
A	Fxw	10	10	0	0
A	Fxw	10	11	0	0
A	Fxw	10	12	0	0
A	Fxw	10	13	0	0
A	Fxw	10	14	0	0
A	Fxw	10	15	0	0
A	Fxw	10	16	0	0
A	Fxw	10	17	0	0
A	Fxw	10	18	0	0
A	Fxw	10	19	0	0
A	Fxw	10	20	0	0
A	Fxw	10	21	0	0
A	Fxw	10	22	0	0
A	Fxw	10	23	0	0
A	Fxw	10	24	0	0
A	Fxw	10	25	0	0
A	Fxw	10	26	0	0
A	Fxw	10	27	0	0
A	Fxw	10	28	0	0
A	Fxw	10	29	0	0
A	Fxw	10	30	0	0
A	Fxw	10	31	0	0
A	Fxw	10	32	0	0
A	Fxw	10	33	0	0
A	Fxw	10	34	0	0
A	Fxw	10	35	0	0
A	Fxw	10	36	0	0
A	Fxw	10	37	0	0
A	Fxw	10	38	0	0
A	Fxw	10	39	0	0
A	Fxw	10	40	0	0
A	Fxw	10	41	0	0
A	Fxw	10	42	0	0
A	Fxw	10	43	0	0
A	Fxw	10	44	0	0
A	Fxw	10	45	0	0
A	Fxw	10	46	0	0
A	Fxw	10	47	0	0
A	Fxw	10	48	0	0
A	Fxw	10	49	0	0
A	Fxw	10	50	0	0
V	Fxa	1	1	1	1
V	Fxa	1	2	1	1
V	Fxa	1	3	1	1
V	Fxa	1	4	1	1
V	Fxa	1	5	0	1
V	Fxa	1	6	0	1
V	Fxa	1	7	0	1
V	Fxa	1	8	0	1
V	Fxa	1	9	0	1
V	Fxa	1	10	0	1
V	Fxa	1	11	0	1
V	Fxa	1	12	0	1
V	Fxa	1	13	0	1
V	Fxa	1	14	0	1
V	Fxa	1	15	0	1
V	Fxa	1	16	0	1
V	Fxa	1	17	0	1
V	Fxa	1	18	0	1
V	Fxa	1	19	0	1
V	Fxa	1	20	0	1
V	Fxa	1	21	0	1
V	Fxa	1	22	0	1
V	Fxa	1	23	0	0
V	Fxa	1	24	0	0
V	Fxa	1	25	0	0
V	Fxa	1	26	0	0
V	Fxa	1	27	0	0
V	Fxa	1	28	0	0
V	Fxa	1	29	0	0
V	Fxa	1	30	0	0
V	Fxa	1	31	0	0
V	Fxa	1	32	0	0
V	Fxa	1	33	0	0
V	Fxa	1	34	0	0
V	Fxa	1	35	0	0
V	Fxa	1	36	0	0
V	Fxa	1	37	0	0
V	Fxa	1	38	0	0
V	Fxa	1	39	0	0
V	Fxa	1	40	0	0
V	Fxa	1	41	0	0
V	Fxa	1	42	0	0
V	Fxa	1	43	0	0
V	Fxa	1	44	0	0
V	Fxa	1	45	0	0
V	Fxa	1	46	0	0
V	Fxa	1	47	0	0
V	Fxa	1	48	0	0
V	Fxa	1	49	0	0
V	Fxa	1	50	0	0
V	Fxa	2	1	1	1
V	Fxa	2	2	1	1
V	Fxa	2	3	1	1
V	Fxa	2	4	1	1
V	Fxa	2	5	1	1
V	Fxa	2	6	1	0
V	Fxa	2	7	1	0
V	Fxa	2	8	0	0
V	Fxa	2	9	0	0
V	Fxa	2	10	0	0
V	Fxa	2	11	0	0
V	Fxa	2	12	0	0
V	Fxa	2	13	0	0
V	Fxa	2	14	0	0
V	Fxa	2	15	0	0
V	Fxa	2	16	0	0
V	Fxa	2	17	0	0
V	Fxa	2	18	0	0
V	Fxa	2	19	0	0
V	Fxa	2	20	0	0
V	Fxa	2	21	0	0
V	Fxa	2	22	0	0
V	Fxa	2	23	0	0
V	Fxa	2	24	0	0
V	Fxa	2	25	0	0
V	Fxa	2	26	0	0
V	Fxa	2	27	0	0
V	Fxa	2	28	0	0
V	Fxa	2	29	0	0
V	Fxa	2	30	0	0
V	Fxa	2	31	0	0
V	Fxa	2	32	0	0
V	Fxa	2	33	0	0
V	Fxa	2	34	0	0
V	Fxa	2	35	0	0
V	Fxa	2	36	0	0
V	Fxa	2	37	0	0
V	Fxa	2	38	0	0
V	Fxa	2	39	0	0
V	Fxa	2	40	0	0
V	Fxa	2	41	0	0
V	Fxa	2	42	0	0
V	Fxa	2	43	0	0
V	Fxa	2	44	0	0
V	Fxa	2	45	0	0
V	Fxa	2	46	0	0
V	Fxa	2	47	0	0
V	Fxa	2	48	0	0
V	Fxa	2	49	0	0
V	Fxa	2	50	0	0
V	Fxa	3	1	1	1
V	Fxa	3	2	1	1
V	Fxa	3	3	1	1
V	Fxa	3	4	1	1
V	Fxa	3	5	1	1
V	Fxa	3	6	1	1
V	Fxa	3	7	1	1
V	Fxa	3	8	0	1
V	Fxa	3	9	0	1
V	Fxa	3	10	0	1
V	Fxa	3	11	0	1
V	Fxa	3	12	0	1
V	Fxa	3	13	0	0
V	Fxa	3	14	0	0
V	Fxa	3	15	0	0
V	Fxa	3	16	0	0
V	Fxa	3	17	0	0
V	Fxa	3	18	0	0
V	Fxa	3	19	0	0
V	Fxa	3	20	0	0
V	Fxa	3	21	0	0
V	Fxa	3	22	0	0
V	Fxa	3	23	0	0
V	Fxa	3	24	0	0
V	Fxa	3	25	0	0
V	Fxa	3	26	0	0
V	Fxa	3	27	0	0
V	Fxa	3	28	0	0
V	Fxa	3	29	0	0
V	Fxa	3	30	0	0
V	Fxa	3	31	0	0
V	Fxa	3	32	0	0
V	Fxa	3	33	0	0
V	Fxa	3	34	0	0
V	Fxa	3	35	0	0
V	Fxa	3	36	0	0
V	Fxa	3	37	0	0
V	Fxa	3	38	0	0
V	Fxa	3	39	0	0
V	Fxa	3	40	0	0
V	Fxa	3	41	0	0
V	Fxa	3	42	0	0
V	Fxa	3	43	0	0
V	Fxa	3	44	0	0
V	Fxa	3	45	0	0
V	Fxa	3	46	0	0
V	Fxa	3	47	0	0
V	Fxa	3	48	0	0
V	Fxa	3	49	0	0
V	Fxa	3	50	0	0
V	Fxa	4	1	1	1
V	Fxa	4	2	1	1
V	Fxa	4	3	0	1
V	Fxa	4	4	0	1
V	Fxa	4	5	0	0
V	Fxa	4	6	0	0
V	Fxa	4	7	0	0
V	Fxa	4	8	0	0
V	Fxa	4	9	0	0
V	Fxa	4	10	0	0
V	Fxa	4	11	0	0
V	Fxa	4	12	0	0
V	Fxa	4	13	0	0
V	Fxa	4	14	0	0
V	Fxa	4	15	0	0
V	Fxa	4	16	0	0
V	Fxa	4	17	0	0
V	Fxa	4	18	0	0
V	Fxa	4	19	0	0
V	Fxa	4	20	0	0
V	Fxa	4	21	0	0
V	Fxa	4	22	0	0
V	Fxa	4	23	0	0
V	Fxa	4	24	0	0
V	Fxa	4	25	0	0
V	Fxa	4	26	0	0
V	Fxa	4	27	0	0
V	Fxa	4	28	0	0
V	Fxa	4	29	0	0
V	Fxa	4	30	0	0
V	Fxa	4	31	0	0
V	Fxa	4	32	0	0
V	Fxa	4	33	0	0
V	Fxa	4	34	0	0
V	Fxa	4	35	0	0
V	Fxa	4	36	0	0
V	Fxa	4	37	0	0
V	Fxa	4	38	0	0
V	Fxa	4	39	0	0
V	Fxa	4	40	0	0
V	Fxa	4	41	0	0
V	Fxa	4	42	0	0
V	Fxa	4	43	0	0
V	Fxa	4	44	0	0
V	Fxa	4	45	0	0
V	Fxa	4	46	0	0
V	Fxa	4	47	0	0
V	Fxa	4	48	0	0
V	Fxa	4	49	0	0
V	Fxa	4	50	0	0
V	Fxa	5	1	1	1
V	Fxa	5	2	1	1
V	Fxa	5	3	1	0
V	Fxa	5	4	1	0
V	Fxa	5	5	1	0
V	Fxa	5	6	0	0
V	Fxa	5	7	0	0
V	Fxa	5	8	0	0
V	Fxa	5	9	0	0
V	Fxa	5	10	0	0
V	Fxa	5	11	0	0
V	Fxa	5	12	0	0
V	Fxa	5	13	0	0
V	Fxa	5	14	0	0
V	Fxa	5	15	0	0
V	Fxa	5	16	0	0
V	Fxa	5	17	0	0
V	Fxa	5	18	0	0
V	Fxa	5	19	0	0
V	Fxa	5	20	0	0
V	Fxa	5	21	0	0
V	Fxa	5	22	0	0
V	Fxa	5	23	0	0
V	Fxa	5	24	0	0
V	Fxa	5	25	0	0
V	Fxa	5	26	0	0
V	Fxa	5	27	0	0
V	Fxa	5	28	0	0
V	Fxa	5	29	0	0
V	Fxa	5	30	0	0
V	Fxa	5	31	0	0
V	Fxa	5	32	0	0
V	Fxa	5	33	0	0
V	Fxa	5	34	0	0
V	Fxa	5	35	0	0
V	Fxa	5	36	0	0
V	Fxa	5	37	0	0
V	Fxa	5	38	0	0
V	Fxa	5	39	0	0
V	Fxa	5	40	0	0
V	Fxa	5	41	0	0
V	Fxa	5	42	0	0
V	Fxa	5	43	0	0
V	Fxa	5	44	0	0
V	Fxa	5	45	0	0
V	Fxa	5	46	0	0
V	Fxa	5	47	0	0
V	Fxa	5	48	0	0
V	Fxa	5	49	0	0
V	Fxa	5	50	0	0
V	Fxa	6	1	1	1
V	Fxa	6	2	1	1
V	Fxa	6	3	1	1
V	Fxa	6	4	1	1
V	Fxa	6	5	1	1
V	Fxa	6	6	1	1
V	Fxa	6	7	0	1
V	Fxa	6	8	0	1
V	Fxa	6	9	0	1
V	Fxa	6	10	0	1
V	Fxa	6	11	0	1
V	Fxa	6	12	0	1
V	Fxa	6	13	0	1
V	Fxa	6	14	0	0
V	Fxa	6	15	0	0
V	Fxa	6	16	0	0
V	Fxa	6	17	0	0
V	Fxa	6	18	0	0
V	Fxa	6	19	0	0
V	Fxa	6	20	0	0
V	Fxa	6	21	0	0
V	Fxa	6	22	0	0
V	Fxa	6	23	0	0
V	Fxa	6	24	0	0
V	Fxa	6	25	0	0
V	Fxa	6	26	0	0
V	Fxa	6	27	0	0
V	Fxa	6	28	0	0
V	Fxa	6	29	0	0
V	Fxa	6	30	0	0
V	Fxa	6	31	0	0
V	Fxa	6	32	0	0
V	Fxa	6	33	0	0
V	Fxa	6	34	0	0
V	Fxa	6	35	0	0
V	Fxa	6	36	0	0
V	Fxa	6	37	0	0
V	Fxa	6	38	0	0
V	Fxa	6	39	0	0
V	Fxa	6	40	0	0
V	Fxa	6	41	0	0
V	Fxa	6	42	0	0
V	Fxa	6	43	0	0
V	Fxa	6	44	0	0
V	Fxa	6	45	0	0
V	Fxa	6	46	0	0
V	Fxa	6	47	0	0
V	Fxa	6	48	0	0
V	Fxa	6	49	0	0
V	Fxa	6	50	0	0
V	Fxa	7	1	1	1
V	Fxa	7	2	1	1
V	Fxa	7	3	0	1
V	Fxa	7	4	0	1
V	Fxa	7	5	0	1
V	Fxa	7	6	0	0
V	Fxa	7	7	0	0
V	Fxa	7	8	0	0
V	Fxa	7	9	0	0
V	Fxa	7	10	0	0
V	Fxa	7	11	0	0
V	Fxa	7	12	0	0
V	Fxa	7	13	0	0
V	Fxa	7	14	0	0
V	Fxa	7	15	0	0
V	Fxa	7	16	0	0
V	Fxa	7	17	0	0
V	Fxa	7	18	0	0
V	Fxa	7	19	0	0
V	Fxa	7	20	0	0
V	Fxa	7	21	0	0
V	Fxa	7	22	0	0
V	Fxa	7	23	0	0
V	Fxa	7	24	0	0
V	Fxa	7	25	0	0
V	Fxa	7	26	0	0
V	Fxa	7	27	0	0
V	Fxa	7	28	0	0
V	Fxa	7	29	0	0
V	Fxa	7	30	0	0
V	Fxa	7	31	0	0
V	Fxa	7	32	0	0
V	Fxa	7	33	0	0
V	Fxa	7	34	0	0
V	Fxa	7	35	0	0
V	Fxa	7	36	0	0
V	Fxa	7	37	0	0
V	Fxa	7	38	0	0
V	Fxa	7	39	0	0
V	Fxa	7	40	0	0
V	Fxa	7	41	0	0
V	Fxa	7	42	0	0
V	Fxa	7	43	0	0
V	Fxa	7	44	0	0
V	Fxa	7	45	0	0
V	Fxa	7	46	0	0
V	Fxa	7	47	0	0
V	Fxa	7	48	0	0
V	Fxa	7	49	0	0
V	Fxa	7	50	0	0
V	Fxa	8	1	1	1
V	Fxa	8	2	1	0
V	Fxa	8	3	0	0
V	Fxa	8	4	0	0
V	Fxa	8	5	0	0
V	Fxa	8	6	0	0
V	Fxa	8	7	0	0
V	Fxa	8	8	0	0
V	Fxa	8	9	0	0
V	Fxa	8	10	0	0
V	Fxa	8	11	0	0
V	Fxa	8	12	0	0
V	Fxa	8	13	0	0
V	Fxa	8	14	0	0
V	Fxa	8	15	0	0
V	Fxa	8	16	0	0
V	Fxa	8	17	0	0
V	Fxa	8	18	0	0
V	Fxa	8	19	0	0
V	Fxa	8	20	0	0
V	Fxa	8	21	0	0
V	Fxa	8	22	0	0
V	Fxa	8	23	0	0
V	Fxa	8	24	0	0
V	Fxa	8	25	0	0
V	Fxa	8	26	0	0
V	Fxa	8	27	0	0
V	Fxa	8	28	0	0
V	Fxa	8	29	0	0
V	Fxa	8	30	0	0
V	Fxa	8	31	0	0
V	Fxa	8	32	0	0
V	Fxa	8	33	0	0
V	Fxa	8	34	0	0
V	Fxa	8	35	0	0
V	Fxa	8	36	0	0
V	Fxa	8	37	0	0
V	Fxa	8	38	0	0
V	Fxa	8	39	0	0
V	Fxa	8	40	0	0
V	Fxa	8	41	0	0
V	Fxa	8	42	0	0
V	Fxa	8	43	0	0
V	Fxa	8	44	0	0
V	Fxa	8	45	0	0
V	Fxa	8	46	0	0
V	Fxa	8	47	0	0
V	Fxa	8	48	0	0
V	Fxa	8	49	0	0
V	Fxa	8	50	0	0
V	Fxa	9	1	1	1
V	Fxa	9	2	0	1
V	Fxa	9	3	0	1
V	Fxa	9	4	0	1
V	Fxa	9	5	0	1
V	Fxa	9	6	0	1
V	Fxa	9	7	0	1
V	Fxa	9	8	0	1
V	Fxa	9	9	0	1
V	Fxa	9	10	0	1
V	Fxa	9	11	0	1
V	Fxa	9	12	0	1
V	Fxa	9	13	0	0
V	Fxa	9	14	0	0
V	Fxa	9	15	0	0
V	Fxa	9	16	0	0
V	Fxa	9	17	0	0
V	Fxa	9	18	0	0
V	Fxa	9	19	0	0
V	Fxa	9	20	0	0
V	Fxa	9	21	0	0
V	Fxa	9	22	0	0
V	Fxa	9	23	0	0
V	Fxa	9	24	0	0
V	Fxa	9	25	0	0
V	Fxa	9	26	0	0
V	Fxa	9	27	0	0
V	Fxa	9	28	0	0
V	Fxa	9	29	0	0
V	Fxa	9	30	0	0
V	Fxa	9	31	0	0
V	Fxa	9	32	0	0
V	Fxa	9	33	0	0
V	Fxa	9	34	0	0
V	Fxa	9	35	0	0
V	Fxa	9	36	0	0
V	Fxa	9	37	0	0
V	Fxa	9	38	0	0
V	Fxa	9	39	0	0
V	Fxa	9	40	0	0
V	Fxa	9	41	0	0
V	Fxa	9	42	0	0
V	Fxa	9	43	0	0
V	Fxa	9	44	0	0
V	Fxa	9	45	0	0
V	Fxa	9	46	0	0
V	Fxa	9	47	0	0
V	Fxa	9	48	0	0
V	Fxa	9	49	0	0
V	Fxa	9	50	0	0
V	Fxa	10	1	1	1
V	Fxa	10	2	0	1
V	Fxa	10	3	0	1
V	Fxa	10	4	0	0
V	Fxa	10	5	0	0
V	Fxa	10	6	0	0
V	Fxa	10	7	0	0
V	Fxa	10	8	0	0
V	Fxa	10	9	0	0
V	Fxa	10	10	0	0
V	Fxa	10	11	0	0
V	Fxa	10	12	0	0
V	Fxa	10	13	0	0
V	Fxa	10	14	0	0
V	Fxa	10	15	0	0
V	Fxa	10	16	0	0
V	Fxa	10	17	0	0
V	Fxa	10	18	0	0
V	Fxa	10	19	0	0
V	Fxa	10	20	0	0
V	Fxa	10	21	0	0
V	Fxa	10	22	0	0
V	Fxa	10	23	0	0
V	Fxa	10	24	0	0
V	Fxa	10	25	0	0
V	Fxa	10	26	0	0
V	Fxa	10	27	0	0
V	Fxa	10	28	0	0
V	Fxa	10	29	0	0
V	Fxa	10	30	0	0
V	Fxa	10	31	0	0
V	Fxa	10	32	0	0
V	Fxa	10	33	0	0
V	Fxa	10	34	0	0
V	Fxa	10	35	0	0
V	Fxa	10	36	0	0
V	Fxa	10	37	0	0
V	Fxa	10	38	0	0
V	Fxa	10	39	0	0
V	Fxa	10	40	0	0
V	Fxa	10	41	0	0
V	Fxa	10	42	0	0
V	Fxa	10	43	0	0
V	Fxa	10	44	0	0
V	Fxa	10	45	0	0
V	Fxa	10	46	0	0
V	Fxa	10	47	0	0
V	Fxa	10	48	0	0
V	Fxa	10	49	0	0
V	Fxa	10	50	0	0
