# Supplementary material for: Is there a hybridization barrier between Gentiana lutea color morphs?
Source: PubMed Central journal article supplement (PMC4627910; doi:10.7717/peerj.1308), 2015-10-27
Supplement: peerj-03-1308-s002.pdf [file peerj-03-1308-s002.pdf]

| Levene's Test for Homogeneity of Variances ( <i>Gentiana lutea</i> 's reproductive system) |              |             |          |          |
|--------------------------------------------------------------------------------------------|--------------|-------------|----------|----------|
| Effect: "Treatment"                                                                        |              |             |          |          |
| Degrees of freedom for all F's: 4, 125                                                     |              |             |          |          |
|                                                                                            | MS<br>Effect | MS<br>Error | F        | p        |
| N°ovules                                                                                   | 226,8064     | 380,3502    | 0,596309 | 0,665962 |

| Effect    | Univariate Tests of Significance for N <sup>o</sup> ovules (Sistema reprodutivo_2011_Torrestio_Plantas inteiras)<br>Sigma-restricted parameterization<br>Effective hypothesis decomposition |                  |         |          |          |
|-----------|---------------------------------------------------------------------------------------------------------------------------------------------------------------------------------------------|------------------|---------|----------|----------|
|           | SS                                                                                                                                                                                          | Degr. of Freedom | MS      | F        | p        |
| Intercept | 1591977                                                                                                                                                                                     | 1                | 1591977 | 1489,054 | 0,000000 |
| Treatment | 6369                                                                                                                                                                                        | 4                | 1592    | 1,489    | 0,209382 |
| Error     | 133640                                                                                                                                                                                      | 125              | 1069    |          |          |
